# Supplementary material for: Initial Experience of Atezolizumab Plus Bevacizumab for Unresectable Hepatocellular Carcinoma in Real-World Clinical Practice
Source: MDPI journal article supplement (doi:10.3390/cancers13112786), 2021-06-03
Supplement: s1 [file s1]

Supplementary Figure 1

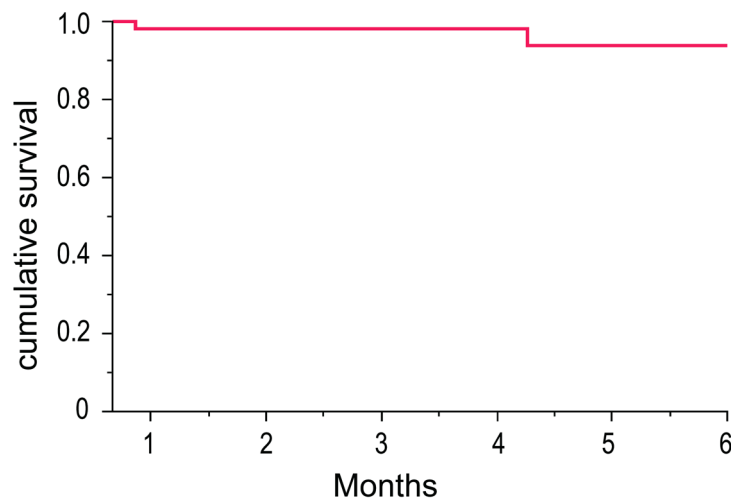

**Figure S1.** Overall survival of the patients treated with atezolizumab plus bevacizumab in the study

**Table S1.** Patient characteristics in difference of MTA previous history.

| Characteristic                       | MTA naïve            | MTA experienced      | <i>p</i> value |
|--------------------------------------|----------------------|----------------------|----------------|
| N                                    | 19                   | 32                   |                |
| Age (years old)                      | 71 (51–80)           | 71.5 (37–85)         | 0.69           |
| Sex (female/male)                    | 2/17                 | 4/28                 | 0.83           |
| Etiology (HBV/HCV/nonBnonC)          | 2/8/9                | 5/11/16              | 0.80           |
| Child-Pugh score (5/6/7)             | 11/6/2               | 18/12/2              | 0.82           |
| Child-Pugh grade (A/B)               | 17/2                 | 30/2                 | 0.58           |
| ALBI score                           | –2.34 (–2.79– –1.33) | –2.39 (–3.10– –1.49) | 0.54           |
| ALBI grade (1/2/3)                   | 3/15/1               | 8/24                 | 0.28           |
| Tumor size (mm)                      | 41 (11–77)           | 39 (17–132)          | 0.47           |
| Up-to-seven criteria (within/beyond) | 3/16                 | 3/29                 | 0.78           |
| BCLC stage (B/C)                     | 10/9                 | 14/18                | 0.53           |
| TNM stage (III/IVA/IVB)              | 10/5/4               | 13/2/17              | 0.029          |
| AFP (ng/mL)                          | 15 (2.1–59,270)      | 262 (1.3–862,642)    | 0.24           |
| DCP (mAU/mL)                         | 978 (18–23,088)      | 2,557 (28–87,529)    | 0.12           |

Data are expressed as median (range), or number.

Abbreviations: MTA, molecular targeted agent; ALBI score, Albumin-bilirubin score; BCLC stage, Barcelona Clinic Liver Cancer stage; AFP,  $\alpha$ -fetoprotein; DCP, des- $\gamma$ -carboxy prothrombin

**Table S2.** Patient characteristics in difference of ALBI grade.

| Characteristic                       | ALBI grade 1 | ALBI grade 2 or 3 | <i>p</i> value |
|--------------------------------------|--------------|-------------------|----------------|
| N                                    | 11           | 40                |                |
| Age (years old)                      | 70 (48–77)   | 80 (37–85)        | 0.63           |
| Sex (female/male)                    | 2/9          | 4/36              | 0.47           |
| Etiology (HBV/HCV/nonBnonC)          | 2/5/4        | 21/5/14           | 0.63           |
| Tumor size (mm)                      | 45 (22–83)   | 40 (11–132)       | 0.67           |
| Up-to-seven criteria (within/beyond) | 1/10         | 5/35              | 0.65           |
| BCLC stage (B/C)                     | 5/6          | 19/21             | 0.90           |
| TNM stage (III/IVA/IVB)              | 5/2/4        | 18/5/17           | 0.87           |

|              |                  |                  |      |
|--------------|------------------|------------------|------|
| AFP (ng/mL)  | 429 (3.9–59,270) | 38 (1.3–862,642) | 0.48 |
| DCP (mAU/mL) | 3610 (29–52,108) | 1114 (18–87,529) | 0.70 |

---

Data are expressed as median (range), or number.

Abbreviations: ALBI score, Albumin-bilirubin score; BCLC stage, Barcelona Clinic Liver Cancer stage; AFP,  $\alpha$ -fetoprotein; DCP, des- $\gamma$ -carboxy prothrombin.
